# Supplementary material for: Tuning the photocurrent responsive and resistive switching performances of stilbazolium/iodoargentate hybrids by modulating the aggregation mode among chromophores
Source: Royal Society of Chemistry journal article supplement (doi:10.1039/d2ce01609e), 2022-12-20
Supplement: d2ce01609e1.pdf [file d2ce01609e1.pdf]

## Supporting Information

### **Tuning the photocurrent responsive and resistive switching performances of stilbazolium/iodoargentate hybrids by modulating aggregation mode among chromophores**

Jing-Jing Chen<sup>a,b</sup>, Chang-Qi Huang<sup>a,b</sup>, Hong-Mei Yi<sup>c</sup>, Zhou-Lin Lv<sup>c</sup>, Wei Wu<sup>c</sup>, Hui-Dong

Zheng<sup>\*a,b</sup> and Hao-Hong Li<sup>\*c</sup>

<sup>a</sup> *Fujian Engineering Research Center of Advanced Manufacturing Technology for Fine Chemicals,*

*College of Chemical Engineering, Fuzhou University, Fuzhou, Fujian, 350108, China*

<sup>b</sup> *Qingyuan Innovation Laboratory, Quanzhou, Fujian, 362801, China*

<sup>c</sup> *College of Chemistry, Fuzhou University, Fuzhou, Fujian, 350108, China*

**Table S1** Crystal data and structure refinement for in this work.

|                                                  | 1                                                                             | 2                                                                               | 3                                                                                            |
|--------------------------------------------------|-------------------------------------------------------------------------------|---------------------------------------------------------------------------------|----------------------------------------------------------------------------------------------|
| Empirical formula                                | C <sub>18</sub> H <sub>20</sub> Ag <sub>2</sub> I <sub>3</sub> N <sub>3</sub> | C <sub>17</sub> H <sub>21</sub> Ag <sub>2</sub> I <sub>3</sub> N <sub>2</sub> O | C <sub>36</sub> H <sub>46</sub> Ag <sub>5</sub> I <sub>7</sub> N <sub>4</sub> O <sub>4</sub> |
| Formula weight                                   | 874.81                                                                        | 865.80                                                                          | 2026.42                                                                                      |
| Crystal system                                   | Monoclinic                                                                    | Monoclinic                                                                      | Triclinic                                                                                    |
| Space group                                      | <i>P</i> 2 <sub>1</sub> / <i>n</i>                                            | <i>P</i> 2 <sub>1</sub> / <i>c</i>                                              | <i>P</i> -1                                                                                  |
| a [Å]                                            | 16.053(3)                                                                     | 7.1992(4)                                                                       | 8.1248(7)                                                                                    |
| b [Å]                                            | 7.0422(14)                                                                    | 13.5373(8)                                                                      | 13.8287(12)                                                                                  |
| c [Å]                                            | 21.680(4)                                                                     | 22.6977(14)                                                                     | 22.9897(19)                                                                                  |
| α[°]                                             | 90                                                                            | 90                                                                              | 100.297(2)                                                                                   |
| β[°]                                             | 107.705(3)                                                                    | 90.1810(10)                                                                     | 93.606(2)                                                                                    |
| γ[°]                                             | 90                                                                            | 90                                                                              | 103.612(2)                                                                                   |
| Volume [Å <sup>3</sup> ]                         | 2334.9(8)                                                                     | 2212.1(2)                                                                       | 2455.1(4)                                                                                    |
| Z                                                | 4                                                                             | 4                                                                               | 2                                                                                            |
| Density (calculated) [mg/m <sup>3</sup> ]        | 2.489                                                                         | 2.600                                                                           | 2.741                                                                                        |
| Absorption coefficient [mm <sup>-1</sup> ]       | 5.652                                                                         | 5.965                                                                           | 6.400                                                                                        |
| F(000)                                           | 1608                                                                          | 1592                                                                            | 1856                                                                                         |
| Theta range for data collection [°]              | 1.97 to 25.08                                                                 | 1.794 to 25.355                                                                 | 1.546 to 25.088                                                                              |
| Reflections collected                            | 14049                                                                         | 17991                                                                           | 19675                                                                                        |
| Independent reflections                          | 4147[ <i>R</i> (int)= 0.0223]                                                 | 4037[ <i>R</i> (int) = 0.0220]                                                  | 8589 [ <i>R</i> (int) = 0.0329]                                                              |
| Data / restraints / parameters                   | 4147 / 0 / 237                                                                | 4037 / 1 / 234                                                                  | 8589 / 6 / 528                                                                               |
| Goodness-of-fit on F <sup>2</sup>                | 1.065                                                                         | 1.180                                                                           | 1.058                                                                                        |
| Final R indices [ <i>I</i> >2σ( <i>I</i> )]      | <i>R</i> <sub>1</sub> = 0.0382,<br><i>wR</i> <sub>2</sub> = 0.0851            | <i>R</i> <sub>1</sub> = 0.0426,<br><i>wR</i> <sub>2</sub> = 0.1131              | <i>R</i> <sub>1</sub> = 0.0401,<br><i>wR</i> <sub>2</sub> = 0.0902                           |
| Largest diff. peak and hole [e·Å <sup>-3</sup> ] | 1.223 and -1.217                                                              | 1.655 and -0.971                                                                | 1.705 and -1.583                                                                             |

**Table S2** Selected bond lengths (Å) and angles of **1** and **2**.

| <b>1</b>                                                       |            |                     |            |                     |            |
|----------------------------------------------------------------|------------|---------------------|------------|---------------------|------------|
| Ag(1)-I(1)                                                     | 2.8148(8)  | Ag(1)-I(2)          | 2.9859(9)  | Ag(1)-I(3)          | 2.7711(9)  |
| Ag(1)-I(2)#1                                                   | 2.9378(9)  | Ag(2)-I(1)          | 2.8259(9)  | Ag(2)-I(2)#1        | 2.9417(9)  |
| Ag(2)-I(2)#2                                                   | 2.9986(9)  | Ag(2)-I(3)#2        | 2.7872(9)  | Ag(1)-Ag(1)#1       | 3.1319(13) |
| Ag(2)-Ag(2)#3                                                  | 3.3123(14) |                     |            |                     |            |
| I(3)-Ag(1)-I(1)                                                | 116.09(3)  | I(3)-Ag(1)-I(2)#1   | 114.54(3)  | I(1)-Ag(1)-I(2)#1   | 102.25(3)  |
| I(1)-Ag(1)-I(2)                                                | 100.35(2)  | I(3)-Ag(1)-I(2)     | 106.86(3)  | I(2)#1-Ag(1)-I(2)   | 116.17(2)  |
| I(3)#2-Ag(2)-I(1)                                              | 121.40(3)  | I(3)#2-Ag(2)-I(2)#1 | 109.95(3)  | I(1)-Ag(2)-I(2)#1   | 101.89(3)  |
| I(1)-Ag(2)-I(2)#2                                              | 105.29(3)  | I(2)#1-Ag(2)-I(2)#2 | 112.23(2)  | I(3)#2-Ag(2)-I(2)#2 | 106.10(3)  |
| Symmetry codes: #1 -x+2,-y+2,-z; #2 x,y-1,z; #3 -x+2,-y+1,-z   |            |                     |            |                     |            |
| <b>2</b>                                                       |            |                     |            |                     |            |
| Ag(1)-I(1)                                                     | 2.8150(10) | Ag(1)-I(2)          | 2.9505(10) | Ag(1)-I(3)          | 2.7876(10) |
| Ag(1)-I(2)#1                                                   | 2.9233(10) | Ag(2)-I(1)#3        | 2.8061(10) | Ag(2)-I(2)          | 2.9540(11) |
| Ag(2)-I(2)#2                                                   | 2.9271(10) | Ag(2)-I(3)          | 2.7834(10) | Ag(1)-Ag(1)#1       | 3.1778(17) |
| Ag(2)-Ag(2)#2                                                  | 3.2458(18) |                     |            |                     |            |
| I(1)-Ag(1)-I(2)#1                                              | 102.93(3)  | I(1)-Ag(1)-I(2)     | 109.26(3)  | I(2)#1-Ag(1)-I(2)   | 114.50(3)  |
| I(3)-Ag(1)-I(1)                                                | 115.63(3)  | I(3)-Ag(1)-I(2)     | 101.33(3)  | I(3)-Ag(1)-I(2)#1   | 113.60(3)  |
| I(1)#3-Ag(2)-I(2)#2                                            | 103.05(3)  | I(1)#3-Ag(2)-I(2)   | 110.16(3)  | I(2)#2-Ag(2)-I(2)   | 113.01(3)  |
| I(3)-Ag(2)-I(1)#3                                              | 117.16(4)  | I(3)-Ag(2)-I(2)#2   | 112.50(3)  | I(3)-Ag(2)-I(2)     | 101.34(3)  |
| Symmetry codes: #1 -x,-y+1,-z+1; #2 -x+1,-y+1,-z+1; #3 x+1,y,z |            |                     |            |                     |            |

**Table S3** Selected bond lengths (Å) and angles of **3**.

|                   |            |                   |            |                   |            |
|-------------------|------------|-------------------|------------|-------------------|------------|
| Ag(1)-I(1)        | 2.8593(9)  | Ag(1)-I(2)        | 2.8320(8)  | Ag(1)-I(3)        | 2.8521(10) |
| Ag(1)-I(5)#1      | 2.8479(9)  | Ag(2)-I(1)        | 2.8646(9)  | Ag(2)-I(2)        | 2.8676(9)  |
| Ag(2)-I(4)        | 2.7937(8)  | Ag(2)-I(6)        | 2.9744(9)  | Ag(3)-I(4)        | 2.7978(9)  |
| Ag(3)-I(1)#2      | 2.8673(9)  | Ag(3)-I(5)        | 2.8803(9)  | Ag(3)-I(6)        | 2.9724(9)  |
| Ag(4)-I(3)#2      | 2.9058(11) | Ag(4)-I(5)        | 2.8419(10) | Ag(4)-I(6)        | 3.0200(9)  |
| Ag(4)-I(7)        | 2.7923(9)  | Ag(5)-I(2)        | 2.8779(10) | Ag(5)-I(3)        | 2.8442(10) |
| Ag(5)-I(6)        | 2.9482(9)  | Ag(5)-I(7)        | 2.8136(10) | Ag(1)-Ag(2)       | 2.9563(9)  |
| Ag(1)-Ag(3)#1     | 2.9799(10) | Ag(1)-Ag(4)#1     | 2.9922(10) | Ag(1)-Ag(5)       | 3.0488(10) |
| Ag(2)-Ag(3)       | 3.1488(10) | Ag(2)-Ag(5)       | 3.2346(10) | Ag(3)-Ag(4)       | 3.1235(10) |
| Ag(4)-Ag(5)       | 3.1639(11) |                   |            |                   |            |
| I(2)-Ag(1)-I(5)#1 | 97.79(3)   | I(2)-Ag(1)-I(3)   | 112.35(3)  | I(5)#1-Ag(1)-I(3) | 114.96(3)  |
| I(2)-Ag(1)-I(1)   | 115.06(3)  | I(5)#1-Ag(1)-I(1) | 112.82(3)  | I(3)-Ag(1)-I(1)   | 104.31(3)  |
| I(4)-Ag(2)-I(1)   | 109.31(3)  | I(4)-Ag(2)-I(2)   | 114.62(3)  | I(1)-Ag(2)-I(2)   | 113.79(3)  |
| I(4)-Ag(2)-I(6)   | 103.37(3)  | I(1)-Ag(2)-I(6)   | 109.69(3)  | I(2)-Ag(2)-I(6)   | 105.39(3)  |
| I(4)-Ag(3)-I(1)#2 | 109.65(3)  | I(4)-Ag(3)-I(5)   | 112.86(3)  | I(1)#2-Ag(3)-I(5) | 111.61(3)  |
| I(4)-Ag(3)-I(6)   | 103.32(3)  | I(1)#2-Ag(3)-I(6) | 108.18(3)  | I(5)-Ag(3)-I(6)   | 110.82(3)  |
| I(7)-Ag(4)-I(5)   | 124.29(3)  | I(7)-Ag(4)-I(3)#2 | 105.14(3)  | I(5)-Ag(4)-I(3)#2 | 113.48(3)  |
| I(7)-Ag(4)-I(6)   | 99.24(3)   | I(5)-Ag(4)-I(6)   | 110.53(3)  | I(3)#2-Ag(4)-I(6) | 100.96(3)  |
| I(7)-Ag(5)-I(3)   | 115.15(3)  | I(7)-Ag(5)-I(2)   | 113.82(3)  | I(3)-Ag(5)-I(2)   | 111.22(3)  |
| I(7)-Ag(5)-I(6)   | 100.47(3)  | I(3)-Ag(5)-I(6)   | 109.29(3)  | I(2)-Ag(5)-I(6)   | 105.81(3)  |

Symmetry codes: #1 x+1,y,z; #2 x-1,y,z

**Table S4** Hydrogen bridging details of this work.

| Compound | D-H...A                | D-H/Å | H...A/Å | D...A/Å   | ∠(D-H...A)/° | Symmetry codes |
|----------|------------------------|-------|---------|-----------|--------------|----------------|
| <b>1</b> | C(1)-H(1B)...I(1)      | 0.98  | 2.97    | 3.916(7)  | 161          | x,1+y,z        |
|          | C(1)-H(1C)...N(3)      | 0.98  | 2.64    | 3.225(10) | 118          |                |
| <b>2</b> | O(1)-H(1)...I(1)       | 0.84  | 2.96    | 3.781(14) | 166          | -2-x,2-y,1-z   |
|          | O(2)-H(2)...O(1)       | 0.84  | 1.91    | 2.728(10) | 164          | x,-1+y,z       |
|          | O(4)-H(4)...O(3)       | 0.84  | 2.19    | 2.752(15) | 125          | -1+x,-1+y,z    |
|          | C(20)-<br>(20B)...O(4) | 0.99  | 2.24    | 3.197(16) | 163          | 1-x,2-y,-z     |
|          | C(30)-H(30)...I(1)     | 0.95  | 3.05    | 3.909(9)  | 152          | x,1+y,z        |
|          | C(36)-(36A)...I(3)     | 0.99  | 2.85    | 3.50(3)   | 124          |                |

**Table S5**  $\pi$ - $\pi$  stacking interactions in this work (lengths in Å and angles in °).

|   | Cg(I)···Cg(J)                                                                            | Symmetry code | Dist. Centroids | Dihedral angle | CgI_Perp dist. | CgJ_Perp dist. |
|---|------------------------------------------------------------------------------------------|---------------|-----------------|----------------|----------------|----------------|
| 2 | Cg(1)→Cg(2)                                                                              | 1+x,y,z       | 3.781(8)        | 10.3(7)        | 3.171(5)       | 3.486(6)       |
|   | Ring(1):N(1)→C(2)→C(3)→C(4)→C(5)→C(6)→;Ring(2):C(9)→C(10)→C(11)→C(12)→C(13)→C(14)→       |               |                 |                |                |                |
| 3 | Cg(1)→Cg(2)                                                                              | 2-x,2-y,-z    | 3.874(5)        | 8.2(4)         | 3.338(4)       | 3.540(4)       |
|   | Cg(3)→Cg(4)                                                                              | -1-x,1-y,1-z  | 3.853(5)        | 1.6(4)         | 3.552(3)       | 3.588(4)       |
|   | Ring(1):C(28)→C(29)→C(30)→C(31)→C(32)→C(33)→;Ring(2):N(3)→C(21)→C(22)→C(23)→C(24)→C(25)→ |               |                 |                |                |                |
|   | →<br>Ring(3):C(10)→C(11)→C(12)→C(13)→C(14)→C(15)→;Ring(4):N(1)→C(3)→C(4)→C(5)→C(6)→C(7)→ |               |                 |                |                |                |

**Table S6** The excited and emission peaks for hybrids and their organic chromophores.

| Compound | Excited peaks (nm) | Emission peaks (nm) | Shift amount (nm) |
|----------|--------------------|---------------------|-------------------|
| CMAMP-I  | 585                | 641                 | 51                |
| 1        | 551                | 590                 |                   |
| HMAMP-I  | 601                | 661                 | 6                 |
| 2        | 605                | 667                 |                   |
| HMAHP-I  | 355                | 734                 | 53                |
| 3        | 617                | 681                 |                   |

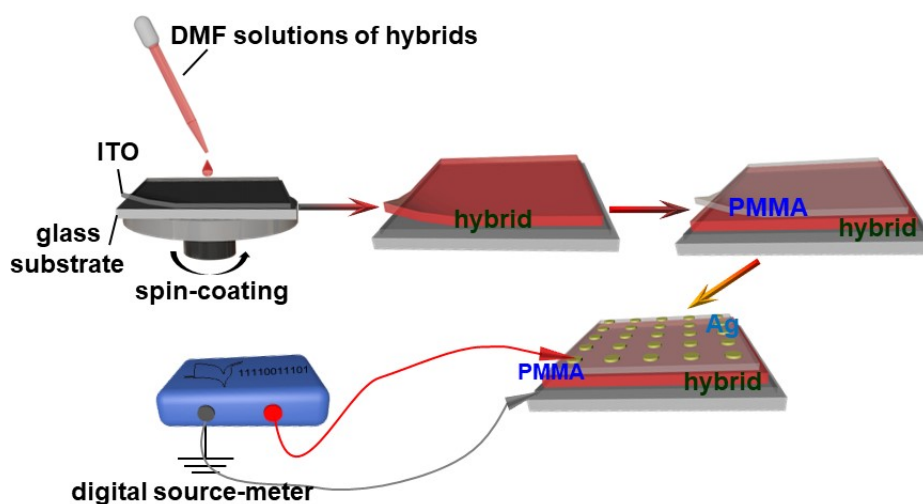**Scheme S1** The preparing process of ITO/hybrid/PMMA/Ag memory devices.

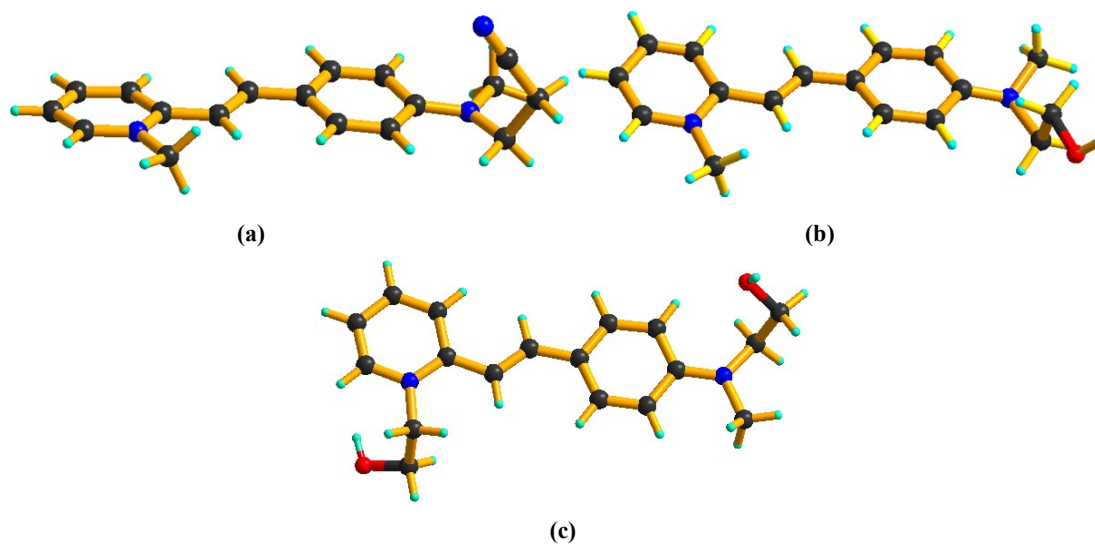

**Fig. S1** The conformations of three stilbazolium cations: (a) CMAMP<sup>+</sup>; (b) HMAMP<sup>+</sup>; (c) HMAHP<sup>+</sup>

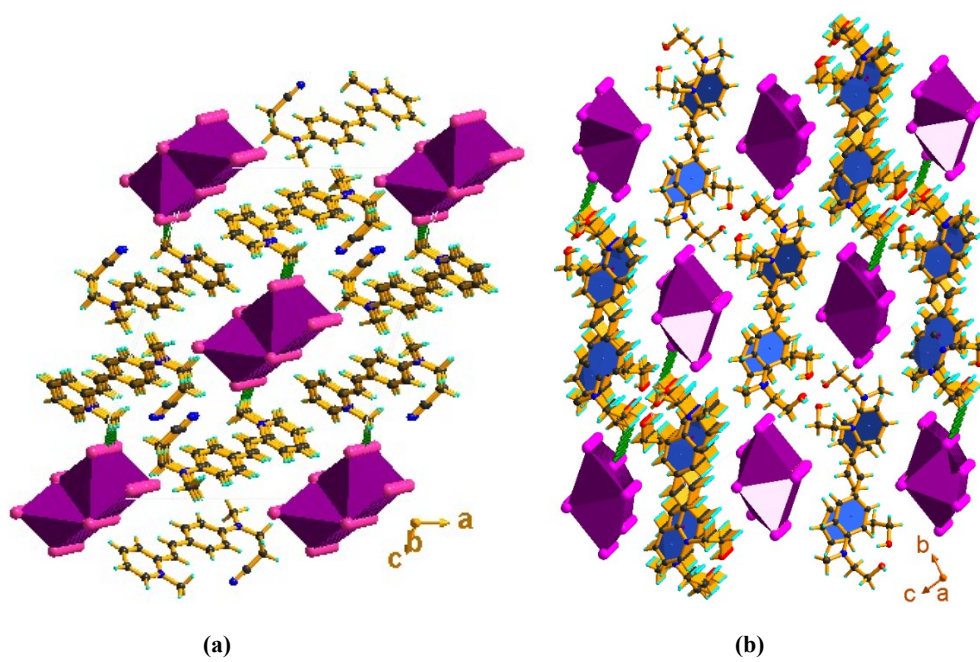

**Fig. S2** Packing diagrams showing the quantum-well architectures: (a) [(CMAMP)(Ag<sub>2</sub>I<sub>3</sub>)]<sub>n</sub>; (b) [(HMAHP)<sub>2</sub>(Ag<sub>5</sub>I<sub>7</sub>)]<sub>n</sub>

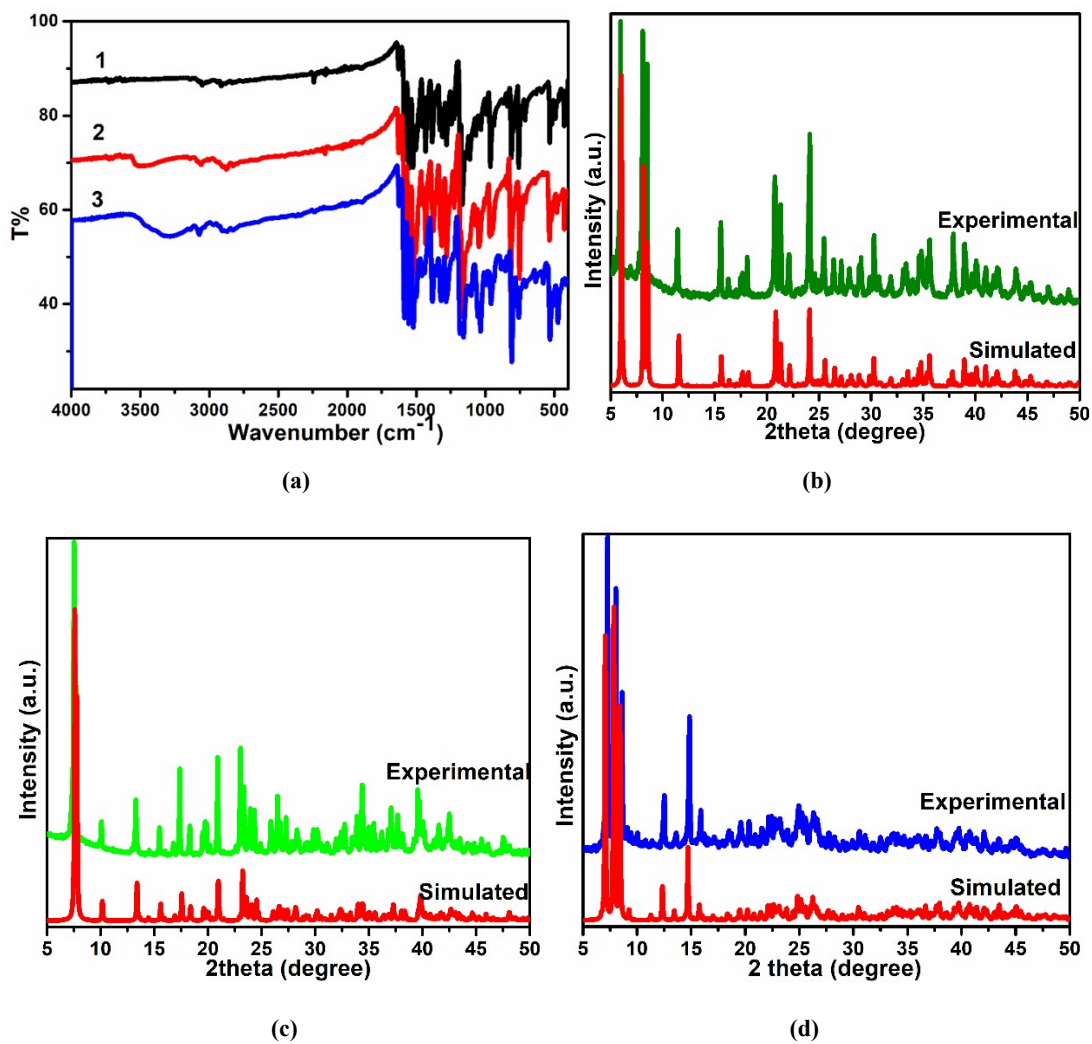

Fig. S3 (a) FT-IR spectra of 1~3; PXRD patterns: (b) 1; (c) 2; (d) 3

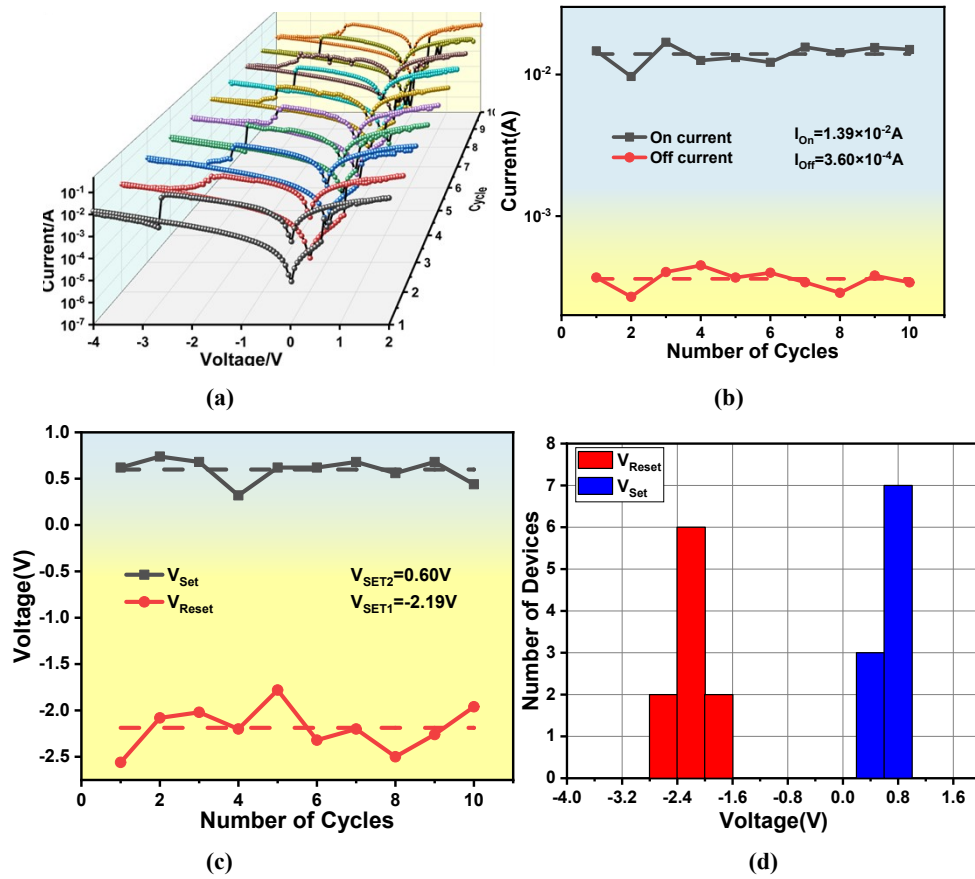

**Fig. S4.** Binary WORM resistive switching performance of ITO/hybrid 2/Ag device: (a) *I-V* characteristics showing 6 cycles; (b) ON/OFF currents with 6 cycles; (c)  $V_{Set}$  and  $V_{Reset}$  with 6 cycles; (d)  $V_{Set}$  and  $V_{Reset}$  distributions



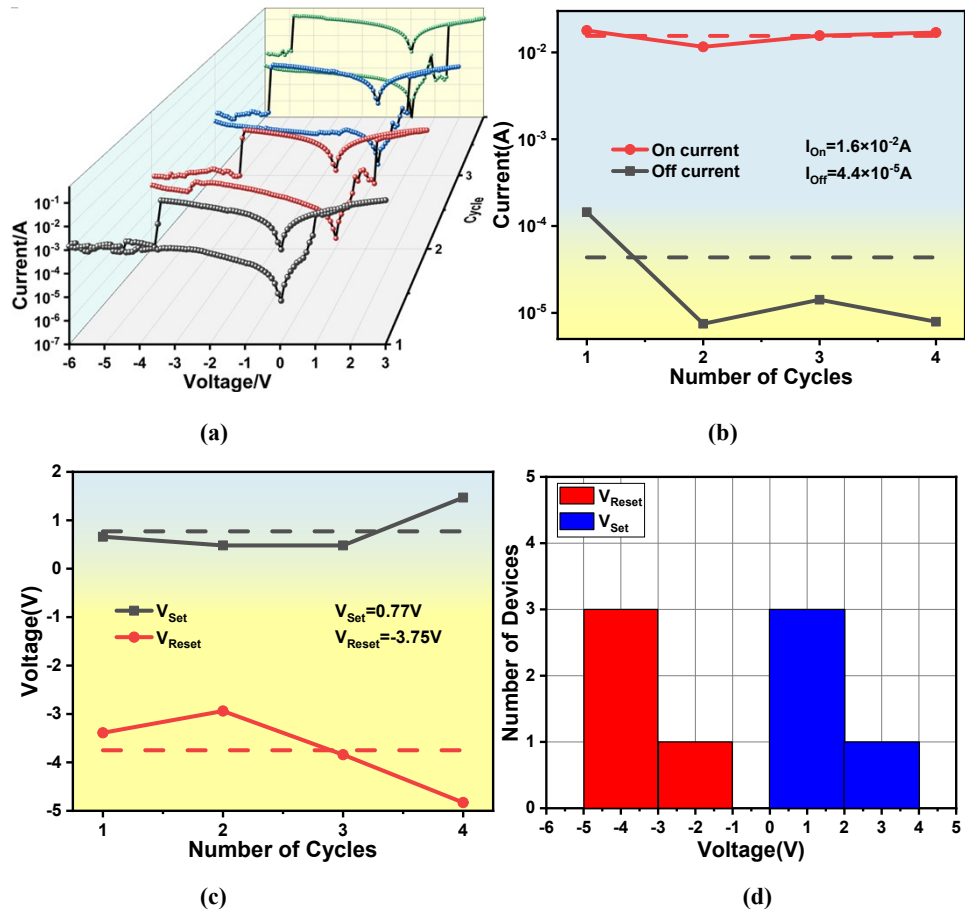

**Fig. S5** Binary WORM resistive switching performance of ITO/hybrid **3**/Ag device: (a)  $I$ - $V$  characteristics showing 6 cycles; (b) ON/OFF currents with 6 cycles; (c)  $V_{Set}$  and  $V_{Reset}$  with 6 cycles; (d)  $V_{Set}$  and  $V_{Reset}$  distributions.

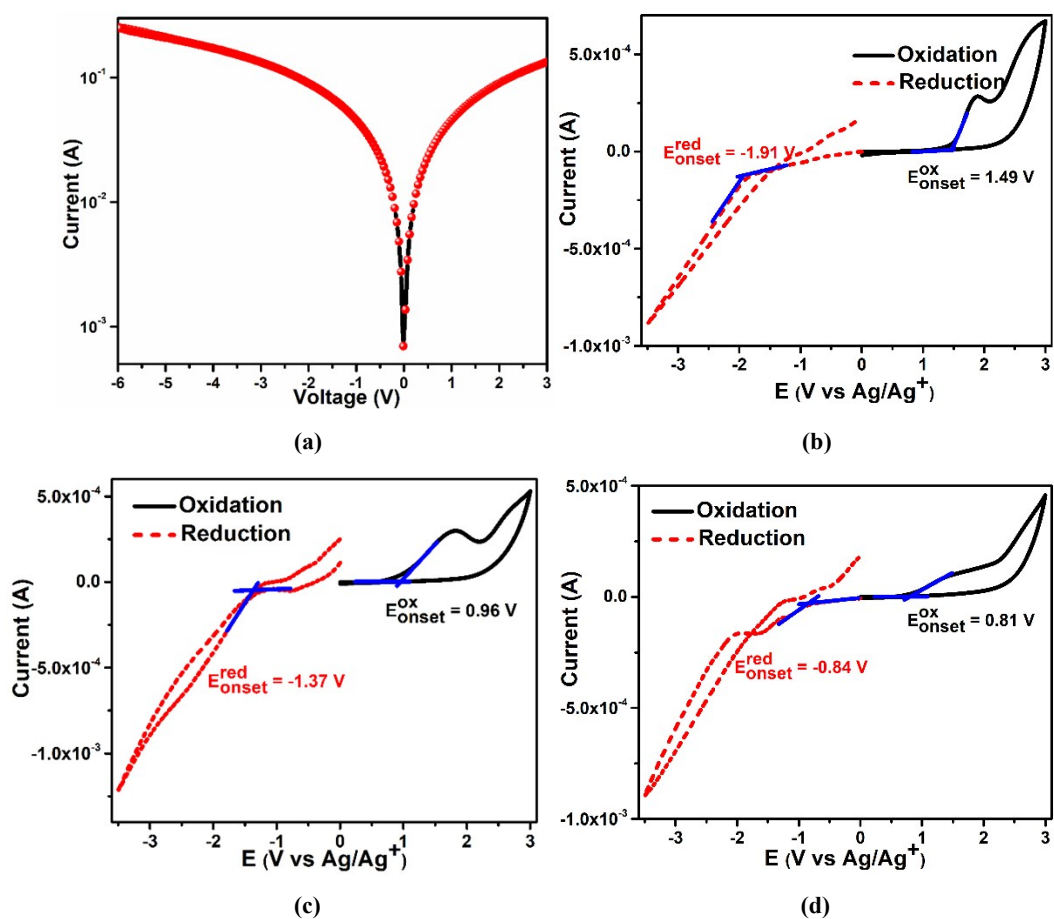

Fig. S6 (a)  $I$ - $V$  characteristics curves of ITO/hybrid 3/Ag device; CV measurements: (b) 1; (c) 2; (d) 3.

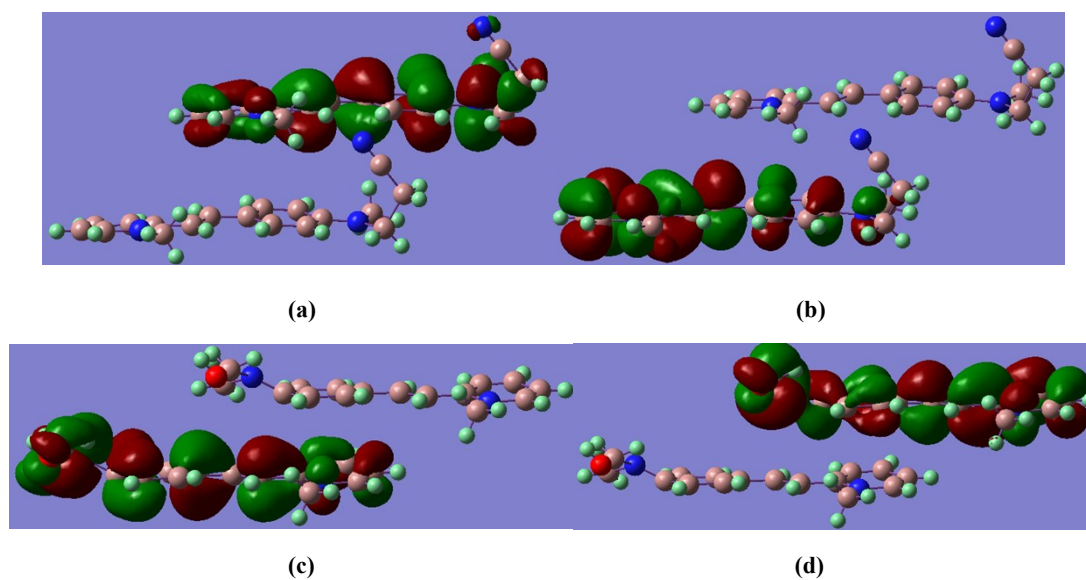

Fig. S7 Frontier molecular orbitals: (a) HOMO (a) and LUMO of  $(\text{CMAMP})_2^{2+}$  dimer in 1; (c) HOMO (d) and LUMO of  $(\text{HMAMP})_2^{2+}$  dimer in 2.
